# Supplementary material
Source: PubMed Central journal article supplement (PMC3098021)

**Supplementary Figure 1. Inhibition of phagocytosis in normal microglia by glioma cancer stem cells (gCSCs).** (A) Representative microscope (40X) images of fluorescent microbeads by normal microglia exposed to (i) control medium, and (ii) gCSC conditioned medium showing inhibition of phagocytosis by gCSCs.

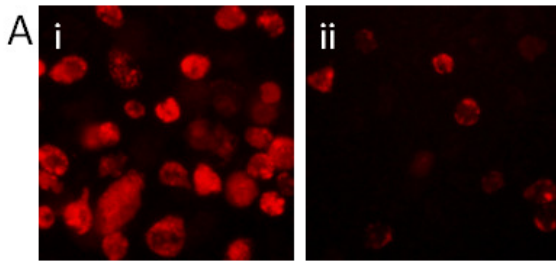

Supplement: supp_noq082_noq082supp.pdf [file supp_noq082_noq082supp.pdf]
